# Supplementary material for: 2001–2022 global gross primary productivity dataset using an ensemble model based on random forest
Source: Copernicus journal article supplement (doi:10.5194/egusphere-2024-114), 2024-02-09
Supplement: Supplementary file 1 [file egusphere-2024-114-supplement.pdf]

# **Supplementary Information For “2001-2022 global gross primary productivity dataset using an ensemble model based on random forest”**

Xin Chen<sup>1</sup>, Tiexi Chen<sup>1,2,3\*</sup>, Xiaodong Li<sup>4</sup>, Yuanfang Chai<sup>5</sup>, Shengjie Zhou<sup>1</sup>, Renjie Guo<sup>6</sup>, Jie Dai<sup>1</sup>

<sup>1</sup>School of Geographical Sciences, Nanjing University of Information Science and Technology, Nanjing 210044, Jiangsu, China.

<sup>2</sup>Qinghai Provincial Key Laboratory of Plateau Climate Change and Corresponding Ecological and Environmental Effects, Qinghai University of Science and Technology, Xining 810016, China

<sup>3</sup>School of Geographical Sciences, Qinghai Normal University, Xining 810008, Qinghai, China.

<sup>4</sup>Qinghai Institute of Meteorological Science, Xining 810008, Qinghai, China.

<sup>5</sup>Department of Earth Sciences, Vrije Universiteit Amsterdam, Boelelaan 1085, 1081 HV, Amsterdam, the Netherlands

<sup>6</sup>Faculty of Geographical Science, Beijing Normal University, Beijing, China.

**Table S1.** Overview of flux sites from ChinaFlux used in this study

| ID | Latitude | Longitude | Vegetation type | Study period | References |
|----|----------|-----------|-----------------|--------------|------------|
| 1  | 23.1737  | 112.5344  | EBF             | 2003-2010    | 1          |
| 2  | 30.85    | 91.0833   | GRA             | 2004-2010    | 2          |
| 3  | 31.8068  | 119.2173  | CRO             | 2015-2018    | 3          |
| 4  | 32.8     | 102.55    | GRA             | 2015-2018    | 4          |
| 5  | 33.4997  | 111.9353  | DBF             | 2017-2018    | 5          |
| 6  | 35.2531  | 100.6992  | GRA             | 2012-2016    | 6          |
| 7  | 37.6094  | 101.3119  | GRA             | 2015-2018    | 7          |
| 8  | 41.1481  | 121.2017  | CRO             | 2005-2014    | 8          |
| 9  | 41.644   | 110.3315  | GRA             | 2015-2018    | 9          |
| 10 | 42.4025  | 128.0958  | DBF             | 2003-2010    | 10         |
| 11 | 43.3255  | 116.4032  | GRA             | 2003-2010    | 11         |
| 12 | 45.4167  | 127.6678  | DBF             | 2016-2018    | 12         |

**Table S2.** Parameters for Revise-EC-LUE

|                         | DBF   | ENF   | EBF   | MF    | GRA   | CRO-C3 | CRO-C4 | SAV   | SHR   | WET   |
|-------------------------|-------|-------|-------|-------|-------|--------|--------|-------|-------|-------|
| $\epsilon_{\text{sun}}$ | 1.52  | 2.50  | 1.96  | 1.82  | 1.79  | 1.77   | 2.90   | 1.74  | 1.27  | 1.30  |
| $\epsilon_{\text{sha}}$ | 3.64  | 4.52  | 3.33  | 3.31  | 3.72  | 3.82   | 3.47   | 4.00  | 3.61  | 3.27  |
| $\theta$                | 29.74 | 32.71 | 32.13 | 32.72 | 31.15 | 30.43  | 19.69  | 28.87 | 31.37 | 32.08 |
| VPD0                    | 16.29 | 8.86  | 10.36 | 12.14 | 10.52 | 14.20  | 15.75  | 14.21 | 8.29  | 15.78 |

**Table S3.** Parameters for EC-LUE

|            | DBF   | ENF   | EBF   | MF    | GRA   | CRO-C3 | CRO-C4 | SAV   | SHR   | WET   |
|------------|-------|-------|-------|-------|-------|--------|--------|-------|-------|-------|
| $\epsilon$ | 2.40  | 2.84  | 2.71  | 2.31  | 2.43  | 2.30   | 3.08   | 2.30  | 1.80  | 1.82  |
| $\theta$   | 33.08 | 34.23 | 29.52 | 31.49 | 28.96 | 32.84  | 30.29  | 31.80 | 30.04 | 30.19 |
| VPD0       | 15.89 | 8.28  | 8.99  | 12.56 | 10.55 | 12.76  | 16.21  | 12.42 | 9.40  | 16.79 |

**Table S4.** Parameters for GPP-kNDVI

|        | formula                          |
|--------|----------------------------------|
| DBF    | $GPP=kNDVI \times 325.68 - 0.21$ |
| ENF    | $GPP=kNDVI \times 625.01 + 0.24$ |
| EBF    | $GPP=kNDVI \times 190.38 + 4.17$ |
| MF     | $GPP=kNDVI \times 341.14 + 0.52$ |
| GRA    | $GPP=kNDVI \times 302.9 + 0.14$  |
| CRO-C3 | $GPP=kNDVI \times 334.42 - 0.71$ |
| CRO-C4 | $GPP=kNDVI \times 584.7 - 0.93$  |
| SAV    | $GPP=kNDVI \times 451.23 + 0.03$ |
| SHR    | $GPP=kNDVI \times 422.21 + 0.14$ |
| WET    | $GPP=kNDVI \times 281.09 + 0.38$ |

**Table S5.** Parameters for GPP-NIRv

|     | formula                        |
|-----|--------------------------------|
| DBF | $GPP=39.31 \times NIRv - 1.83$ |

|        |                                  |
|--------|----------------------------------|
| ENF    | $GPP=47.08 \times NIR_v^{-0.77}$ |
| EBF    | $GPP=25.56 \times NIR_v + 2.17$  |
| MF     | $GPP=37.65 \times NIR_v^{-1.19}$ |
| GRA    | $GPP=33.53 \times NIR_v^{-0.54}$ |
| CRO-C3 | $GPP=36.94 \times NIR_v^{-1.55}$ |
| CRO-C4 | $GPP=59.61 \times NIR_v^{-1.29}$ |
| SAV    | $GPP=44.92 \times NIR_v^{-1.13}$ |
| SHR    | $GPP=24.28 \times NIR_v^{-0.06}$ |
| WET    | $GPP=28.01 \times NIR_v^{-0.06}$ |

**Text S1.** Detailed description of four remote sensing models

1.1 EC-LUE

EC-LUE is a type of light use efficiency model developed by Yuan et al. The original model was driven by normalized vegetation index (NDVI), photosynthetically active radiation (PAR), air temperature and the Bowen ratio of sensible latent heat flux, the Bowen ratio of sensible latent heat flux was replaced by VPD to characterize the constraints of atmospheric drought later, and the effect of CO<sub>2</sub> on GPP was integrated at the same time. The basic form is as follows

$$GPP = PAR \times FPAR \times \varepsilon \times C_s \times \min(T_s, W_s) \quad (1)$$

FPAR is the ratio of canopy absorption PAR calculated by NDVI,  $\varepsilon$  is the maximum light use efficiency.  $C_s$ ,  $T_s$  and  $W_s$  respectively represent the influence of  $CO_2$ , temperature and VPD:

$$C_s = \frac{C_i - \theta}{C_i + 2\theta} \quad (2)$$

$$T_s = \frac{(T_a - 0) \times (T_a - 40)}{(T_a - 0) \times (T_a - 40) - (T_a - 20.33) \times (T_a - 20.33)} \quad (3)$$

$$W_s = \frac{VPD_0}{VPD + VPD_0} \quad (4)$$

In the formula,  $C_i$  and  $\theta$  respectively represent the  $CO_2$  concentration in the air between leaf cells and the  $CO_2$  compensation point during no-dark respiration.  $T_a$  is the air temperature, and  $VPD_0$  is the empirical coefficient. In this model,  $\theta$ ,  $\varepsilon$  and  $VPD_0$  need to be calibrated by GPP of flux tower.

## 1.2 Revised-EC-LUE

Different from the commonly used light use efficiency model, Revised-EC-LUE divides the canopy into sunlit and shaded leaves, and its effectiveness has been proved in several flux sites. The basic form is as follows:

$$GPP = (\varepsilon_{sun} \times APAR_{sun} + \varepsilon_{sha} \times APAR_{sha}) \times C_s \times \min(T_s, W_s) \quad (5)$$

$\varepsilon_{sun}$  and  $\varepsilon_{sha}$  represent the maximum light use efficiency of sunlit and shaded leaves respectively,  $APAR_{sun}$  and  $APAR_{sha}$  represent the PAR absorbed by sunlit and shaded leaves respectively. All the processes can refer to the article of Zheng et al.,  $C_s$ ,  $T_s$  and  $W_s$  represent the influence of  $CO_2$ , temperature and VPD respectively, and their basic forms are the same as formula (2) - (4). Therefore, the parameters to be calibrated in this model include  $\varepsilon_{sun}$ ,  $\varepsilon_{sha}$ ,  $\theta$ , and  $VPD_0$ .

### 1.3 GPP- NIRV

Near-infrared Vegetation Index (NIRV) proposed by Badgley et al., a new vegetation index that approximates the proportion of near-infrared light reflected by vegetation, it has been shown to be directly related to SIF and can be used to estimate GPP. The basic form is as follows

$$GPP = a \times NIRV + b \quad (6)$$

a and b represent the slope and intercept, respectively. NIRV can be calculated using satellite-based red band and near infrared band.

$$NIRV = NDVI \times NIR = \frac{NIR-R}{NIR+R} \times NIR \quad (7)$$

NIR and R represent red band and near infrared band respectively.

### 1.4 GPP-KNDVI

Similar to NIRV, KNDVI is also the newly proposed vegetation index. In comparison with GPP and SIF, KNDVI always shows stronger correlation than NIRV and NDVI, and has a unique effect in dealing with the saturation of vegetation index. The form is as follows

$$GPP = a \times KNDVI + b \quad (8)$$

a and b represent the slope and intercept, respectively. NIRV can be calculated using satellite-based red band and near infrared band.

$$KNDVI = \tanh\left(\frac{NIR-R}{NIR+R}\right) \quad (9)$$

NIR and R represent red band and near infrared band respectively.

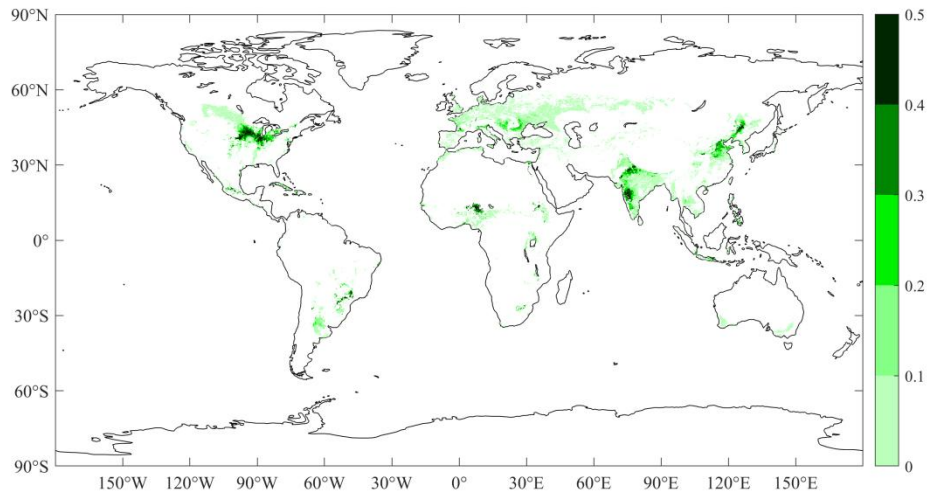

**Figure S1.** Distribution map of C4 crops.

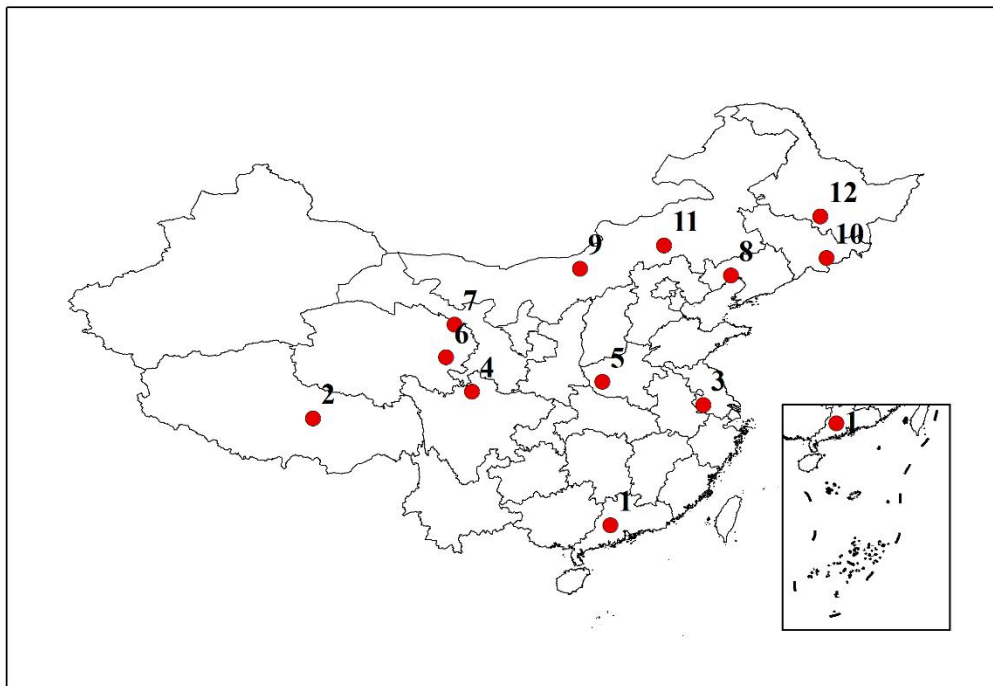

**Figure S2.** The flux site location of ChinaFlux used in this study.

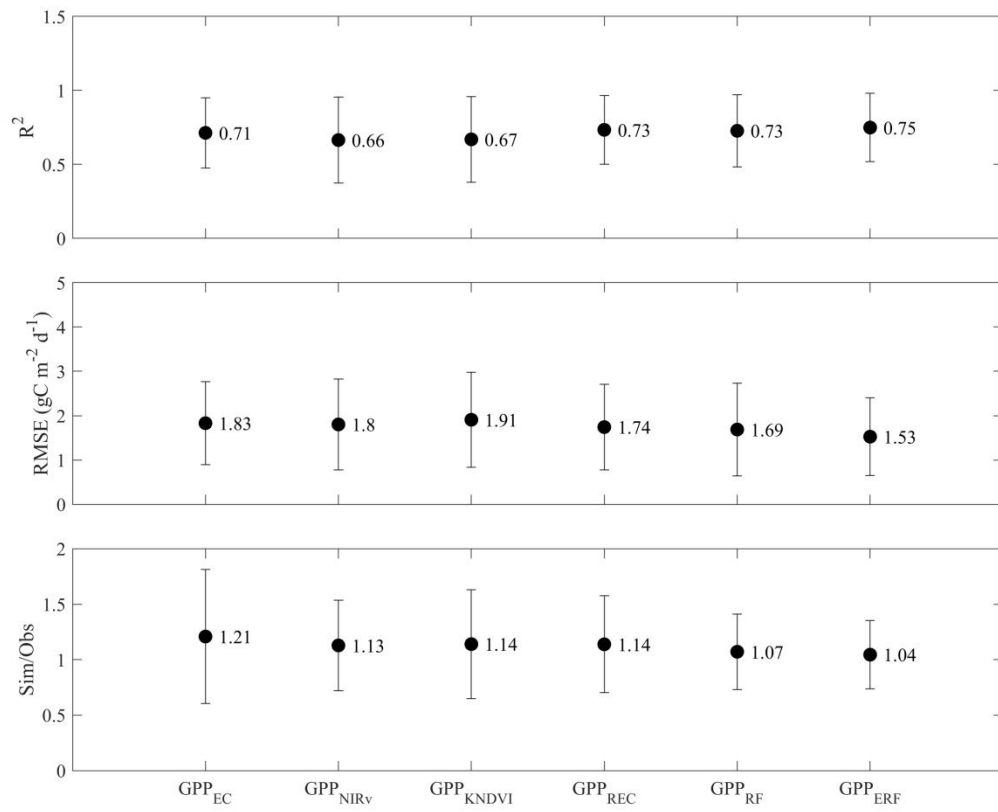

**Figure S3.** Average model accuracy of six models at all sites



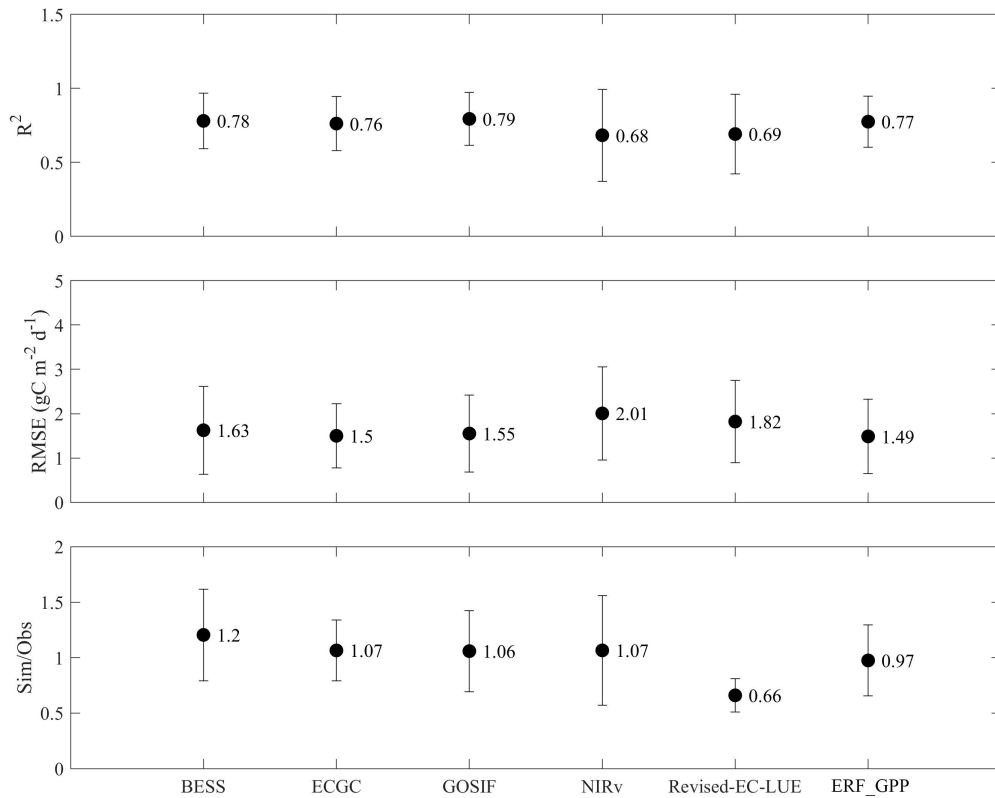

**Figure S4.** Average model accuracy of GPP datasets at all sites from ChinaFlux

1. An observation dataset of carbon and water fluxes in a mixed coniferous broad-leaved forest at Dinghushan, Southern China (2003 – 2010)
2. Shi, P., and He, Y. (2021). An observation dataset of carbon and water fluxes over alpine meadow in Damxung (2004 – 2010). Science Data Bank.
3. Yanlian, Z., Yongguang, Z., Tingting, Z.H.U., and Weimin, J.U. (2023). A dataset of carbon and water fluxes in the cropland ecosystem at Jurong Station (2015-2020). Science Data Bank.
4. Chen, W., Wang, S., and Niu, S. (2023). A dataset of carbon, water and heat fluxes of Zoige alpine meadow from 2015 to 2020. Science Data Bank.
5. Niu, X., Sun, P., Tao, S., Chen, Z., Niu, B., and Liu, S. (2023). A dataset of carbon and water fluxes in a natural oak forest of Baotianman in Henan Province (2017-2018). Science Data Bank.
6. Fuquan, H.E., Qi, L.I., Dongdong, C., and Liang, Z. (2023). A dataset of carbon, water and heat fluxes over an *Elymus nutans* artificial grassland in the Sanjiangyuan Area (2012–2016). Science Data Bank.
7. Zhang, F., Li, H., Zhao, L., Zhang, L., Chen, Z., Zhu, J., Xu, S., Yang, Y., Zhao, X., and Yu, G. (2020). An observation dataset of carbon, water and heat fluxes of alpine wetland in Haibei (2004–2009). Science Data Bank.
8. Sen, Z., Li, Z., Guangsheng, Z., Qingyu, J.I.A., Rongping, L.I., and Yu, W. (2023). A dataset

- of carbon and water flux observations in the agricultural ecosystem of spring maize in Jinzhou (2005–2014). Science Data Bank.
9. Jiabin, S., Li, Z., Guangsheng, Z., Yujie, Y.A.N., and Sen, Z. (2023). A dataset of carbon and water fluxes of the temperate desert steppe in Damao Banner, Inner Mongolia (2015–2018). Science Data Bank.
  10. A dataset of carbon and water flux observation over broad-leaved red pine forest in Changbai Mountain (2003–2010). Science Data Bank.
  11. A dataset of carbon and water fluxes over Xilinhot temperate steppe in Inner Mongolia (2003 – 2010). Science Data Bank.
  12. Xingchang, W., Keming, H.U., Fan, L.I.U., Yuan, Z.H.U., Quanzhi, Z., and Chuankuan, W. (2023). A dataset of observed carbon fluxes on deciduous broad-leaved forest at the Maershan Station from 2016 to 2018. Science Data Bank.
